# Supplementary material for: Reversal of New Onset Type 1 Diabetes by Oral Salmonella-Based Combination Therapy and Mediated by Regulatory T-Cells in NOD Mice
Source: PubMed Central journal article supplement (PMC6400227; doi:10.3389/fimmu.2019.00320), 2019-02-26
Supplement: Presentation_1.pdf [file Presentation_1.pdf]

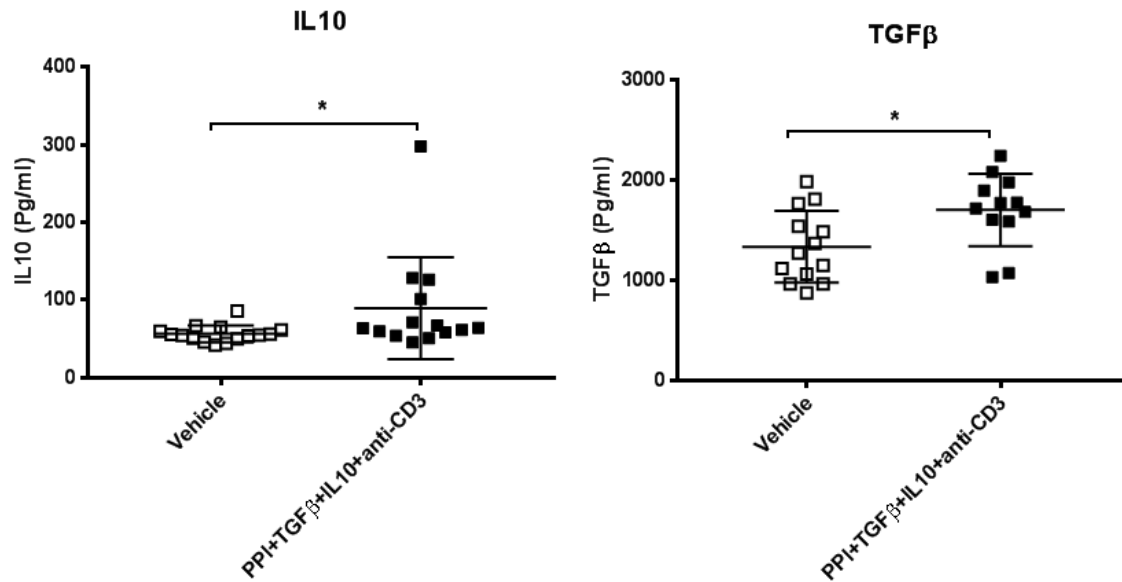

**Supplementary Figure 1.** *Salmonella*-based combined therapy increases tolerogenic regulatory cytokines. Serum was collected from vaccinated and vehicle treated NOD mice at 60 days post-vaccination and the levels of IL10 and TGFβ were measured using Mouse ELISA Kit. Data presented as means  $\pm$  SD from 2 independent experiments. Significant differences were determined by Mann-Whitney *t* test. \* $P < 0.05$  differences between combined therapy and vehicle treated.

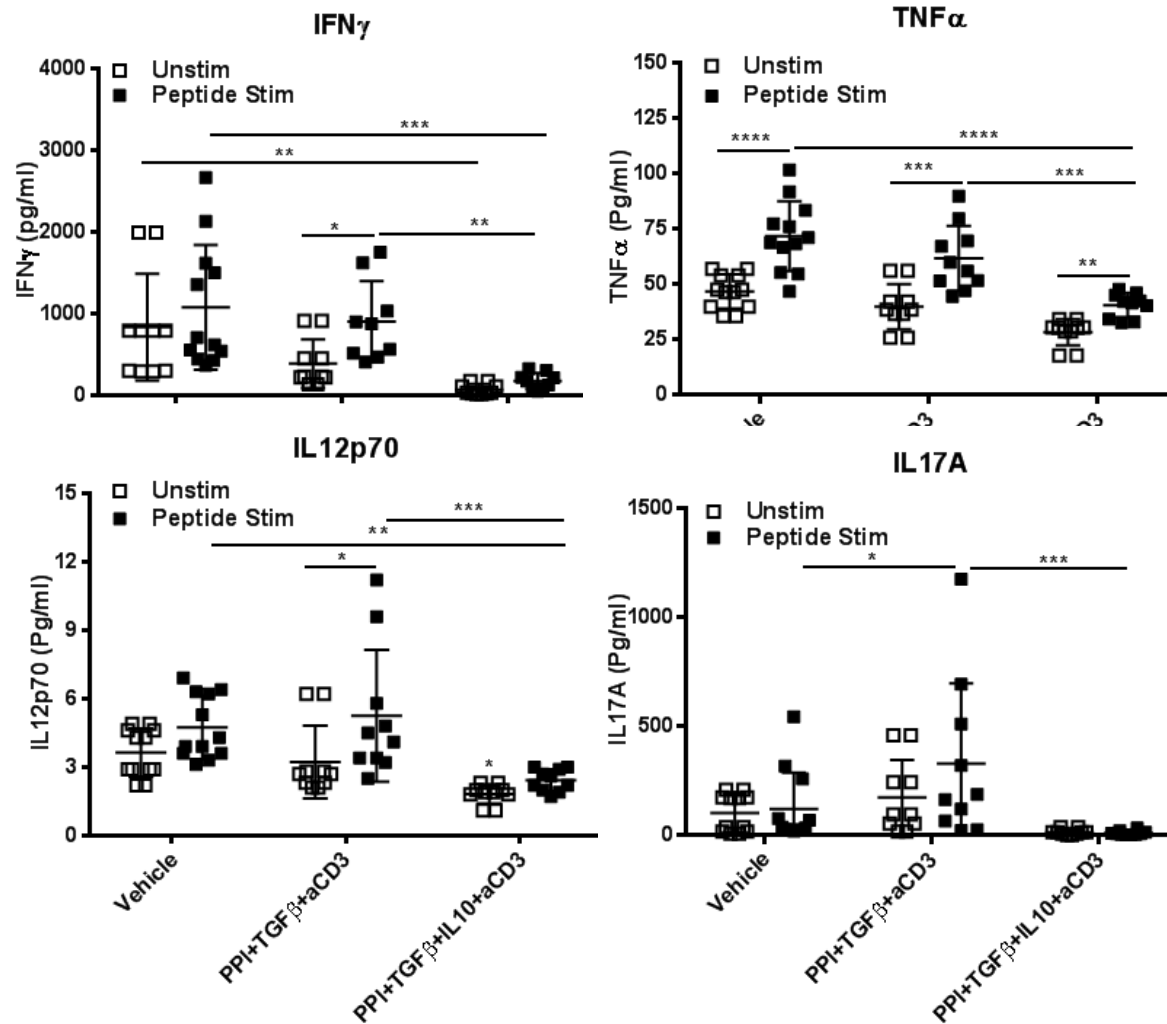

**Supplementary Figure 2.** Combined therapy specifically inhibits secretion of inflammatory cytokines. Splenocytes were harvested from NOD mice at day 60 post-vaccination and re-stimulated with insulin (B9-23) peptide *in vitro* for 72 h. Secretion of IFN $\gamma$ , TNF $\alpha$ , IL12p70 and IL17A were quantified by multiplex Luminex analysis of culture supernatants obtained from peptide stimulated or un-stimulated splenocytes. Data presented as means  $\pm$  SD and obtained from 2 independent experiments. Statistical analysis using two-way ANOVA shows the significance between combined therapy and vehicle group (\*p < 0.05, \*\*p < 0.01, \*\*\*p < 0.001, \*\*\*\*p < 0.0001)

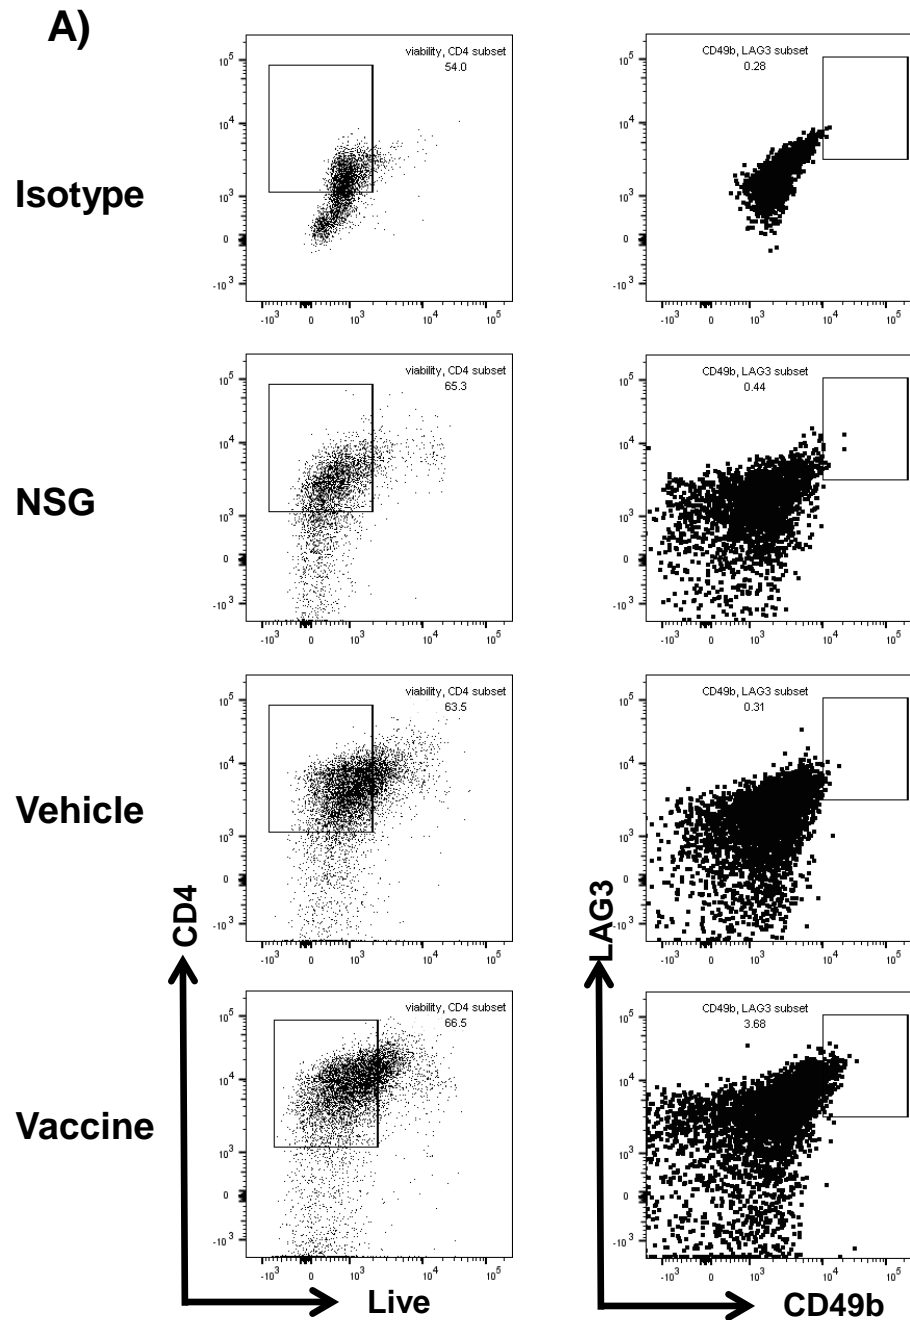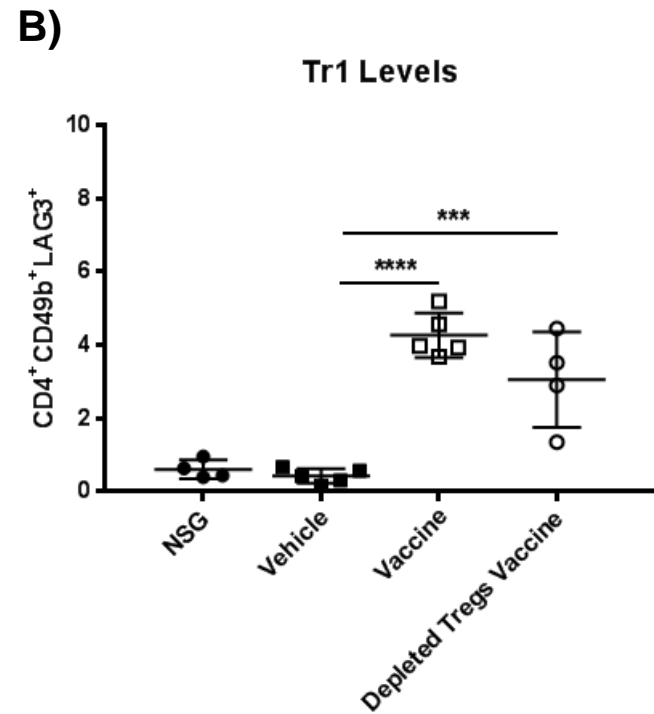

**Supplementary Figure 3.** Combined vaccine increases the frequency of Tr1 in NSG mice. Femal 7-8 weeks old of NSG recipient mice were adoptively transferred with indicated cell types. Splenocytes were isolated after 2 months post-transfer. Splenocytes from NSG mice used as negative control. **(A)** Representative FACS plots gated on live CD4 T cells indicate the frequency of CD4<sup>+</sup>CD49b<sup>+</sup>LAG3<sup>+</sup> T cells in the spleens of mice from the indicated groups. **(B)** Scatter plots of the percentages of CD4<sup>+</sup>CD49b<sup>+</sup>LAG3<sup>+</sup> Tr1. Data presented as means  $\pm$  SD. Statistical analysis using one-way ANOVA shows the significance between splenocytes from vaccine or Treg depleted splenocytes compared to splenocytes from vehicle group (\*\*\*,  $p < 0.001$ ; \*\*\*\*,  $p < 0.0001$ ).
